# Supplementary material
Source: publisher site journal article supplement (https://www.dovepress.com/article/500360)

# Material and methods

**Hematoxylin eosin staining**

Sampling: The intestinal tissue of anesthetized mice was collected in the first step. Fixed: The collected intestinal tissue was immediately immersed in 4% paraformaldehyde and fixed for 24 hours.Dehydration: To ensure effective penetration and saturation before embedding, the fixed intestinal tissue was dehydrated from the fixative. It was soaked in a series of gradually increasing concentrations of ethanol, starting from 70% ethanol and gradually reaching 95%, and finally placed in 100% ethanol.Embedding: After dehydration, the dehydrated intestinal tissue was immersed in melted paraffin to ensure complete tissue encapsulation.Slicing: Using a rotary microtome, the embedded intestinal tissue was cut into thin slices of 5 microns. Staining: The slices were subjected to eosin eosin blue staining for staining treatment.Imaging: The imaging of the intestinal tissue was performed using an optical microscope.

**Apoptosis**

The method of sampling, fixation, dehydration, embedding, and sectioning was the same as described in hematoxylin eosin staining.TUNEL staining: The TUNEL staining procedure was carried out following the instructions of the TUNEL apoptosis detection kit (Beyotime, China).Fluorescence microscopy imaging: The TUNEL stained intestinal tissue slices were placed on a fluorescence microscope, and an appropriate fluorescence filter was selected for imaging.

**Supplementary Figure 1** The PCA analysis of GSE37013 dataset.


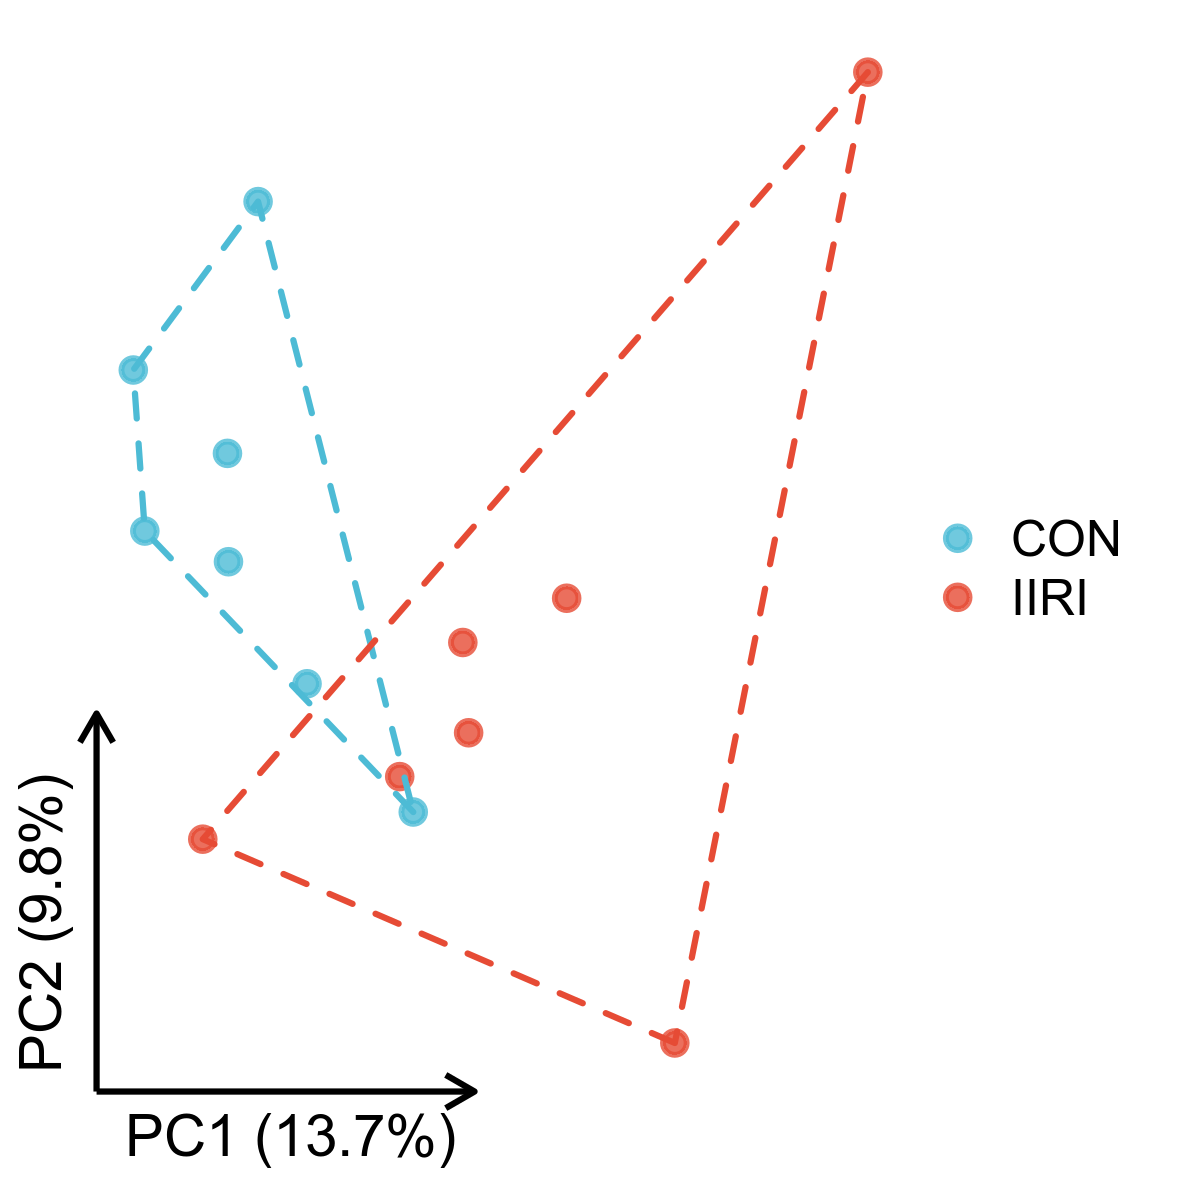

Supplement: Supplementary file 1 [file get_supplementary_file.php]
